# Supplementary material for: Accuracy of Prospective Assessments of 4 Large Language Model Chatbot Responses to Patient Questions About Emergency Care: Experimental Comparative Study
Source: PubMed Central journal article supplement (PMC11574488; doi:10.2196/60291), 2024-11-04
Supplement: jmir_v26i1e60291_app1.pdf [file jmir_v26i1e60291_app1.pdf]

## Research prompts

| #  | Prompt                                                       |
|----|--------------------------------------------------------------|
| 1  | What should I do if someone is having chest pain?            |
| 2  | What should I do if someone may be having a stroke?          |
| 3  | What should I do if someone is having a bad headache?        |
| 4  | What should I do if someone is having a bad sore throat?     |
| 5  | What should I do if someone is having bad stomach pain?      |
| 6  | What should I do if someone is having bad back pain?         |
| 7  | What should I do if someone faints?                          |
| 8  | What should I do if someone is having heavy period bleeding? |
| 9  | What should I do if someone is having a bad cold?            |
| 10 | What should I do if someone overdoses?                       |
